# Supplementary material
Source: Springer Nature journal article supplement (https://www.springermedizin.de/resource/supplementary/12939_2012_328_MOESM4_ESM.docx/9550884)
Supplement: MOESM4 [file 9550884]

| **Table 3- Cause of referrals by ethnicity distribution** | | | | | | | | | | | |
| --- | --- | --- | --- | --- | --- | --- | --- | --- | --- | --- | --- |
| **Disease** | | **BALOCH** | **FARS** | **HAZARA** | **PASHTUN** | **SADAT** | **TAJIK** | **UZBEK** | **OTHERS** | **Not Indicated** | **Total** |
| **Ophthalmic diseases** | Count | 7 | 682 | 3310 | 58 | 490 | 635 | 17 | 157 | 129 | 5485 |
| % | 9.2 | 26.2 | 25.9 | 10.2 | 27.3 | 19.6 | 12.4 | 11.8 | 21.3 | 23.7 |
| **Neoplasms** | Count | 16 | 290 | 1646 | 99 | 172 | 493 | 17 | 242 | 109 | 3084 |
| % | 21.1 | 11.1 | 12.9 | 17.3 | 9.6 | 15.2 | 12.4 | 18.1 | 18 | 13.3 |
| **Nephropathies** | Count | 6 | 158 | 1461 | 61 | 219 | 371 | 35 | 188 | 49 | 2548 |
| % | 7.9 | 6.1 | 11.4 | 10.7 | 12.2 | 11.4 | 25.5 | 14.1 | 8.1 | 11 |
| **Ischemic Heart Diseases** | Count | 5 | 437 | 1150 | 51 | 165 | 375 | 4 | 146 | 64 | 2397 |
| % | 6.6 | 16.8 | 9 | 8.9 | 9.2 | 11.6 | 2.9 | 10.9 | 10.5 | 10.3 |
| **Perinatal diseases** | Count | 1 | 203 | 1140 | 72 | 188 | 305 | 10 | 134 | 85 | 2138 |
| % | 1.3 | 7.8 | 8.9 | 12.6 | 10.5 | 9.4 | 7.3 | 10 | 14 | 9.2 |
| **Congenital anomalies** | Count | 4 | 38 | 644 | 52 | 86 | 182 | 19 | 95 | 48 | 1168 |
| % | 5.3 | 1.5 | 5 | 9.1 | 4.8 | 5.6 | 13.9 | 7.1 | 7.9 | 5 |
| **Appendicitis** | Count | 1 | 206 | 534 | 10 | 74 | 162 | 0 | 45 | 17 | 1049 |
| % | 1.3 | 7.9 | 4.2 | 1.8 | 4.1 | 5 |  | 3.4 | 2.8 | 4.5 |
| **Labor complications** | Count | 0 | 116 | 432 | 4 | 49 | 137 | 1 | 20 | 7 | 766 |
| % |  | 4.5 | 3.4 | 0.7 | 2.7 | 4.2 | 0.7 | 1.5 | 1.2 | 3.3 |
| **Deafness** | Count | 1 | 137 | 384 | 2 | 70 | 83 | 0 | 15 | 4 | 696 |
| % | 1.3 | 5.3 | 3 | 0.4 | 3.9 | 2.6 |  | 1.1 | 0.7 | 3 |
| **Liver, Billiary, Pancreas diseases** | Count | 8 | 15 | 423 | 34 | 62 | 84 | 8 | 30 | 29 | 693 |
| % | 10.5 | 0.6 | 3.3 | 6 | 3.5 | 2.6 | 5.8 | 2.2 | 4.8 | 3 |
| **Urinary disorders** | Count | 3 | 136 | 321 | 13 | 51 | 90 | 0 | 24 | 7 | 645 |
| % | 3.9 | 5.2 | 2.5 | 2.3 | 2.8 | 2.8 |  | 1.8 | 1.2 | 2.8 |
| **Neurologic disorders** | Count | 2 | 143 | 317 | 6 | 53 | 78 | 1 | 30 | 6 | 636 |
| % | 2.6 | 5.5 | 2.5 | 1.1 | 3 | 2.4 | 0.7 | 2.2 | 1 | 2.7 |
| **Fractures** | Count | 3 | 18 | 399 | 20 | 43 | 81 | 14 | 37 | 17 | 632 |
| % | 3.9 | 0.7 | 3.1 | 3.5 | 2.4 | 2.5 | 10.2 | 2.8 | 2.8 | 2.7 |
| **Hematologic diseases** | Count | 19 | 10 | 213 | 63 | 35 | 108 | 5 | 155 | 17 | 625 |
| % | 25 | 0.4 | 1.7 | 11 | 1.9 | 3.3 | 3.6 | 11.6 | 2.8 | 2.7 |
| **TB (all forms)** | Count | 0 | 15 | 426 | 26 | 39 | 57 | 6 | 17 | 19 | 605 |
| % |  | 0.6 | 3.3 | 4.6 | 2.2 | 1.8 | 4.4 | 1.3 | 3.1 | 2.6 |
| **Total** | Count | 76 | 2604 | 12800 | 571 | 1796 | 3241 | 137 | 1335 | 607 | 23167 |
| % | 100% | 100% | 100% | 100% | 100% | 100% | 100% | 100% | 100% | 100% |

*Source: UNHCR Database 2005-2010*
